# Supplementary material for: How well do hydrological models simulate streamflow extremes and drought-to-flood transitions?
Source: Copernicus journal article supplement (doi:10.5194/egusphere-2025-781), 2025-03-24
Supplement: Supplementary file 1 [file egusphere-2025-781-supplement.pdf]

# **How well do hydrological models simulate streamflow extremes and drought-to-flood transitions?**

Eduardo Muñoz-Castro<sup>1,2,3</sup>, Bailey J. Anderson<sup>1,2,3</sup>, Paul C. Astagneau<sup>1,2,3</sup>, Daniel L. Swain<sup>4,5,6</sup>, Pablo A. Mendoza<sup>7,8</sup>, Manuela I. Brunner<sup>1,2,3</sup>

<sup>1</sup>WSL Institute for Snow and Avalanche Research SLF, Davos Dorf, Switzerland

<sup>2</sup>Climate Change, Extremes and Natural Hazards in Alpine Regions Research Center CERC, Davos Dorf, Switzerland

<sup>3</sup>Institute for Atmospheric and Climate Science, ETH Zurich, Zurich, Switzerland

<sup>4</sup>California Institute for Water Resources, University of California Agriculture and Natural Resources, Davis, CA, USA

<sup>5</sup>Institute of the Environment and Sustainability, University of California, Los Angeles, Los Angeles, CA, USA

<sup>6</sup>Capacity Center for Climate and Weather Extremes, National Center for Atmospheric Research, Boulder, CO, USA

<sup>7</sup>Civil Engineering Department, Universidad de Chile, Santiago, Chile

<sup>8</sup>Advanced Mining Technology Centre (AMTC), Universidad de Chile, Santiago, Chile

*Correspondence to:* Eduardo Muñoz-Castro (eduardo.munoz-castro@slf.ch)

## **Contents of this file**

This supplementary material file expands on the results of the main manuscript to support - in some cases generalize - and reinforce the findings presented there. The methodology used to generate the data and figures presented here is detailed in the main manuscript. The contents of this file are listed below:

- Figure S1: Sensitivity test to explore the effect of the threshold used to define droughts and floods in the number of events per year.
- Figure S2: Sensitivity test to explore the effect of the threshold used to define droughts and floods in the model's performance detecting streamflow extreme events.
- Figure S3: Difference in the CSI by putting no weights (reference) and different weights (alternative) on the variability term of the KGE for different hydrological models.
- Figure S4: Difference in the CSI by using no weights HiLo case (reference) and different weights (alternative) on the variability term of the KGE for different hydrological models.
- Figure S5: Spearman's rank correlation coefficient between catchment attributes and  $\Delta$ CSI for weighted cases with respect to the unweighted reference.
- Figure S6: Performance by using no weights HiLo case with different KGE formulation as objective function for calibration.
- Figure S7: Bias in hydrological signatures by using no weights HiLo case with different KGE formulation as objective function for calibration.
- Figure S8: Correlation between observed and simulated variables using no weights HiLo case with different KGE formulation as objective function for calibration.
- Figure S9: Difference in the CSI by using no weights HiLo case (reference) and different weights and streamflow transformations (alternative) for different hydrological models.
- Figure S10: Difference in the NSE by using no weights HiLo case (reference) and different weights and streamflow transformations (alternative) for different hydrological models.
- Figure S11: CSI per streamflow extreme, objective function, hydrological model and country.

- Figure S12: Results of the ANOVA applied to categorical indices and hydrological variables.
- Figure S13: Correlation between CSI and catchment attributes.
- Figure S14: Parameter agreement for the calibrated model.
- Figure S15: Relative importance of parameters explaining the total variance of the critical the CSI associated with drought, floods, and drought-to-flood transitions.
- Figure S16: Relative importance of bias in hydrological signatures explaining the total variance of the critical success index (CSI) associated with drought, floods, and drought-to-flood transitions.
- Figure S17: Spearman's rank correlation between the relative importance of model parameters and catchment attributes.
- Figure S18: Bias between simulated and observed streamflow extreme events computed at the event scale.
- Table S1: Hydrological signatures computed.
- Table S2: Catchments and configurations with CSI higher than zero for rapid drought-to-flood transitions.

**Figure S1: Sensitivity test to explore the role of the threshold used to define droughts and floods in the number of events per year.**

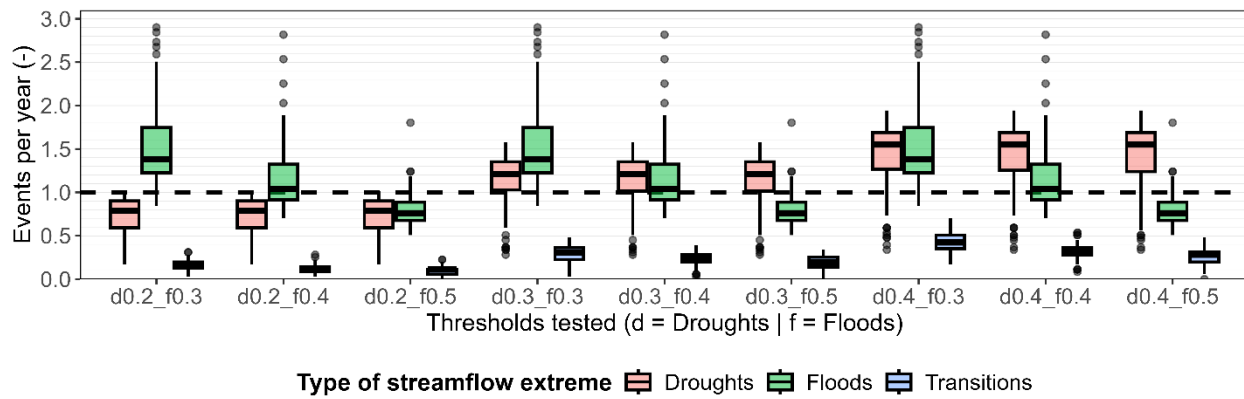

Figure S1: Number of events per year depending on the threshold used for the definition of droughts and floods. The notation “dX\_fY” refers to the use of the Xth and Yth percentile to define the variable and fixed threshold required to identify streamflow droughts (d) and floods (f) respectively.

**Figure S2: Sensitivity test to explore the effect of the threshold used to define droughts and floods in the model's performance detecting streamflow extreme events.**

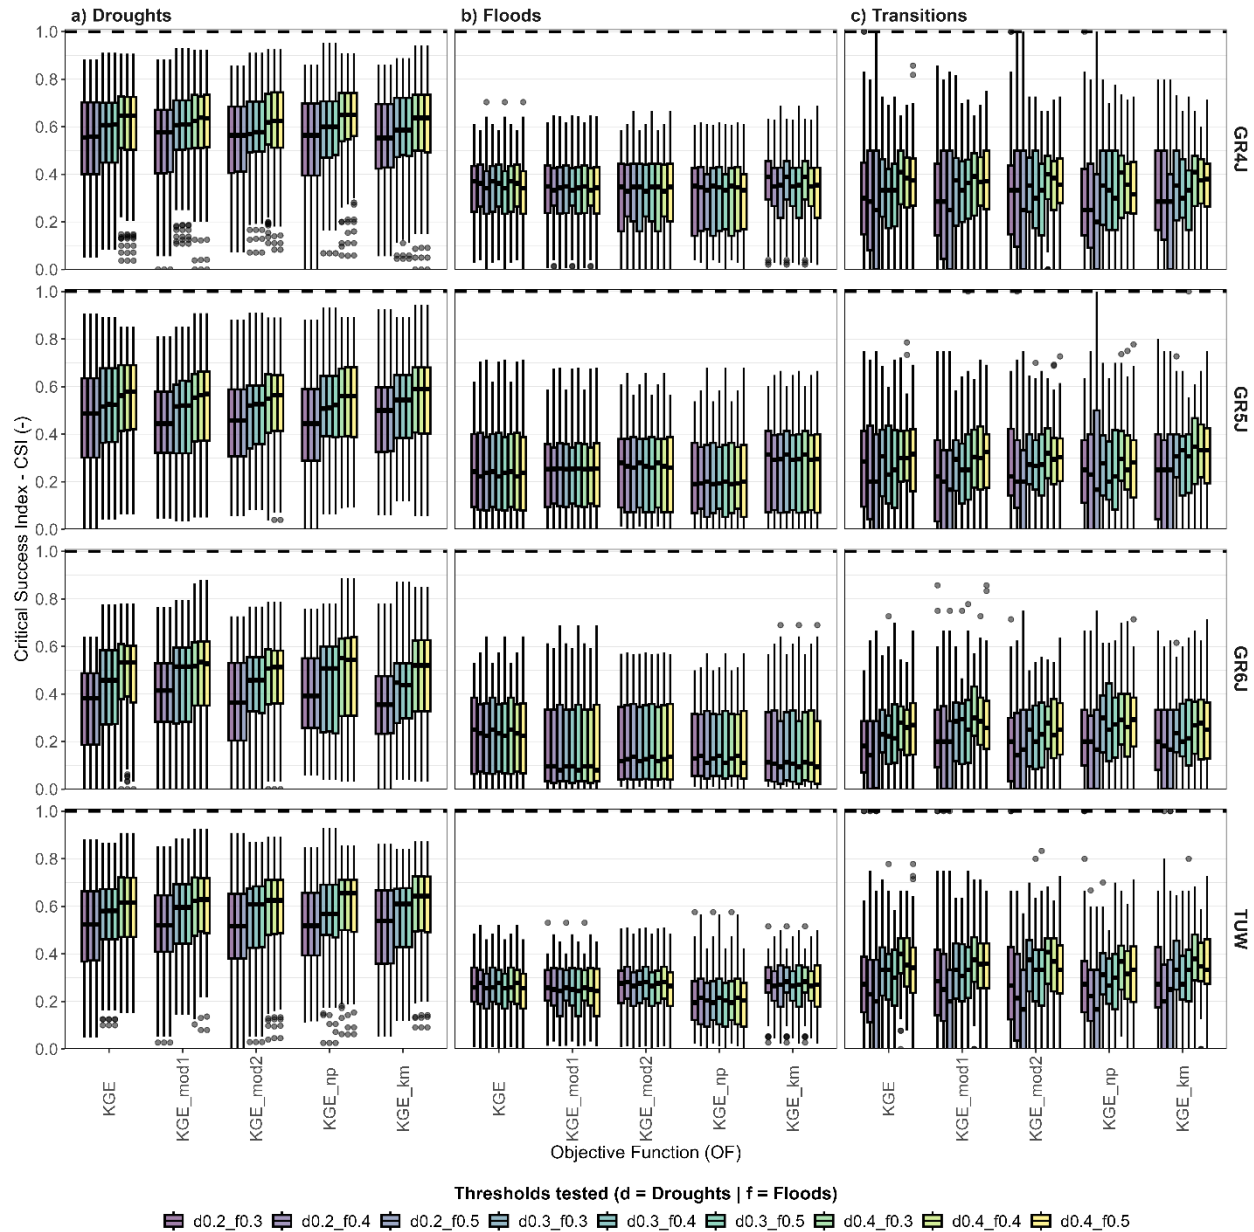

Figure S2: Performance of the GR4J, GR5J, GR6J and TUW models (in the rows) detecting a) droughts, b) floods, and c) transitions, according to different thresholds used for the identification of streamflow extreme events. For each type of extreme event and hydrological model, the results are compared according to different formulations of KGE (unweighted and HiLo) used as objective functions.

**Figure S3: Difference in the CSI by putting no weights (reference) and different weights (alternative) on the variability term of the KGE for different hydrological models**

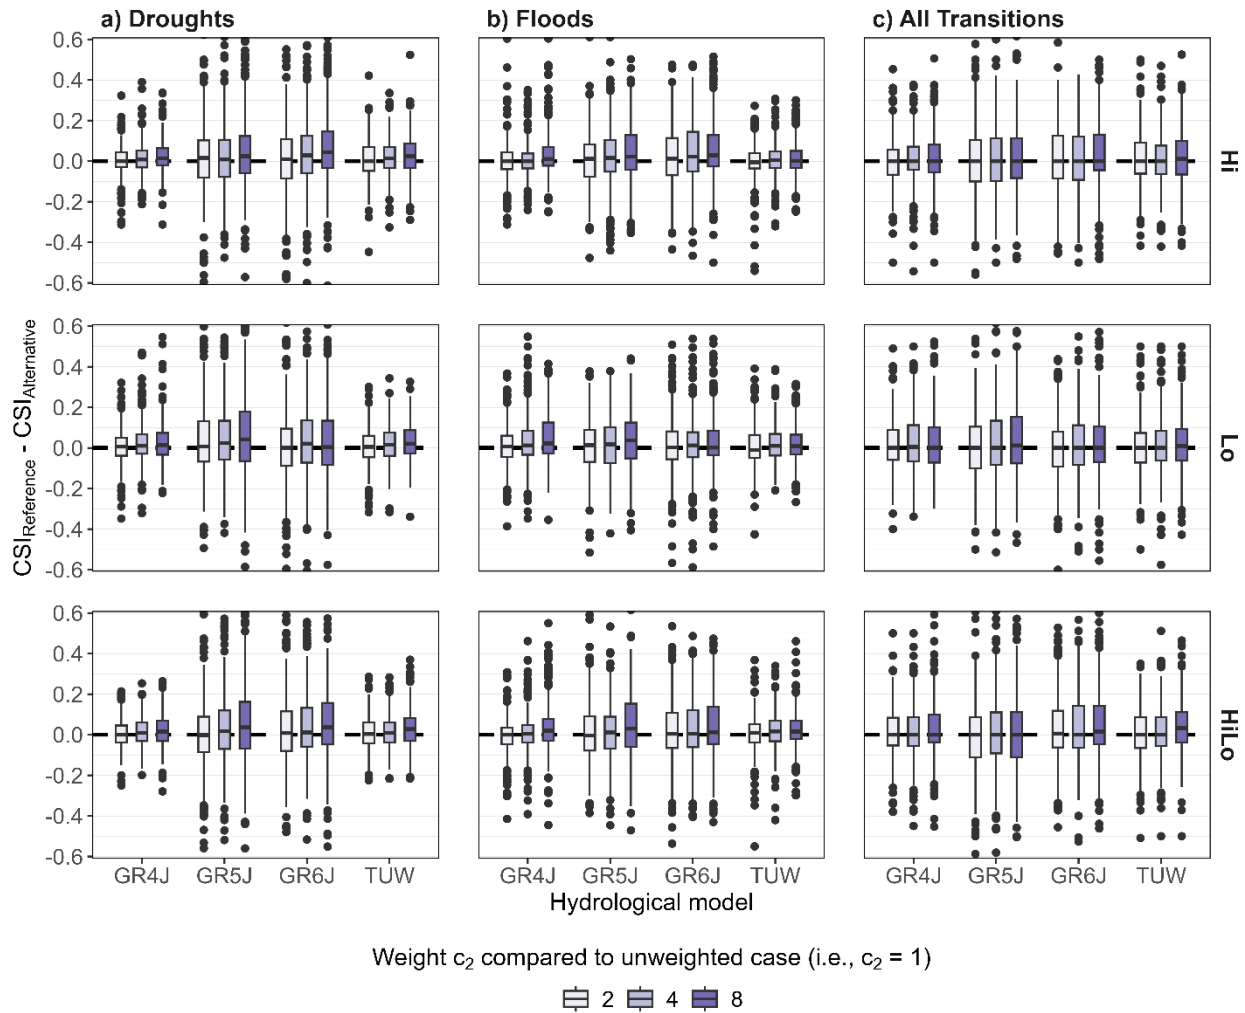

Figure S3: Difference in the Critical Success Index (CSI) for simulations using model calibrations with no weights (reference) versus different weights (alternative) on the KGE variability term for a) droughts, b) floods, and c) transitions. Each alternative is compared with its unweighted analog. Differences are calculated as "reference - alternative" with values above (below) 0 indicating better (worse) performance of the reference (alternative). Supplementary figure associated to Figure 5a in the main manuscript.

**Figure S4: Difference in the CSI by using no weights HiLo case (reference) and different weights (alternative) on the variability term of the KGE for different hydrological models**

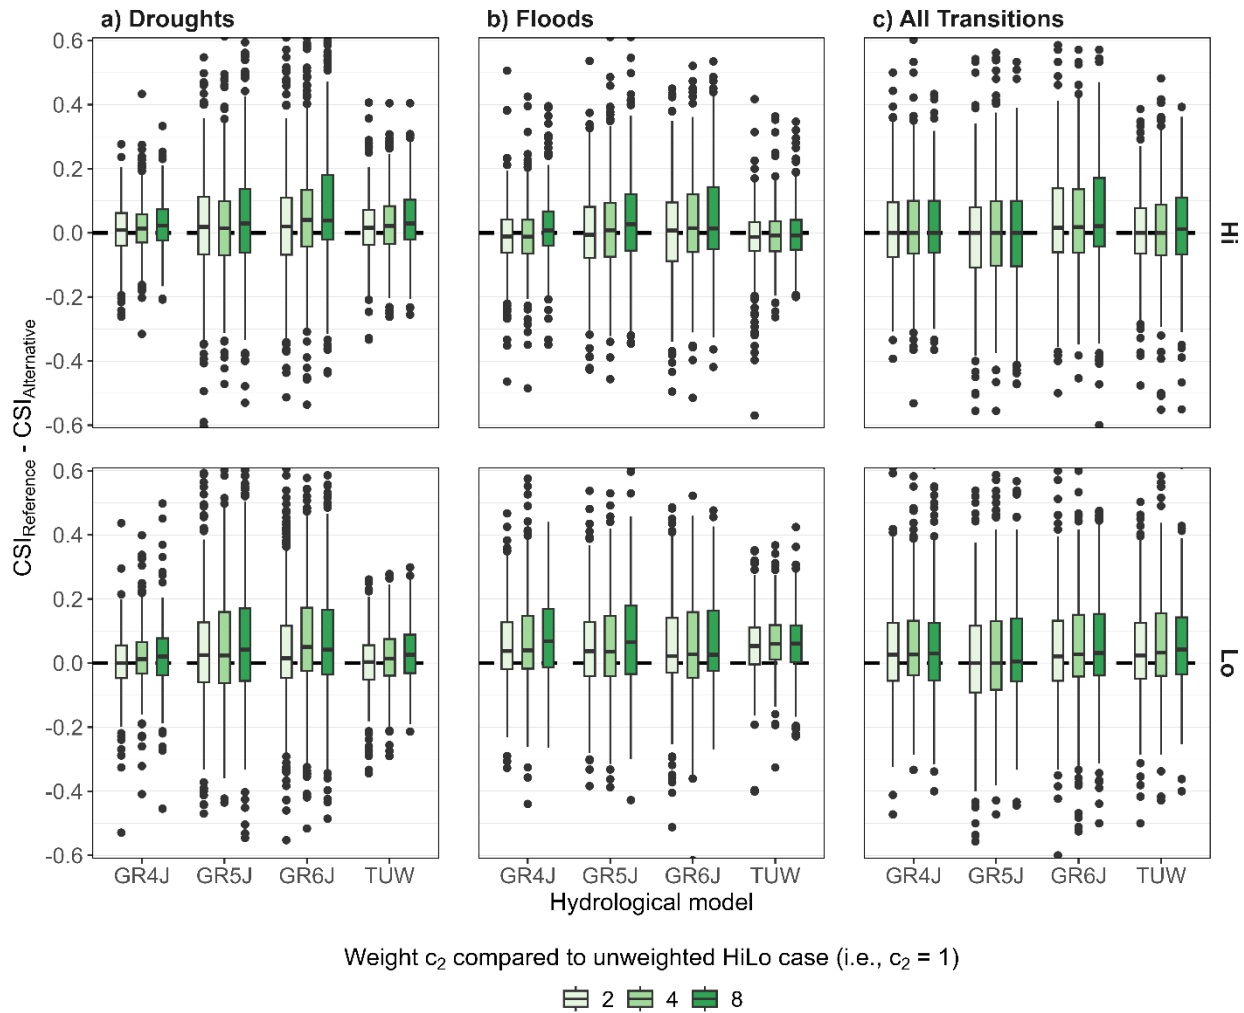

Figure S4: Difference in the Critical Success Index (CSI) for simulations using model calibrations with no weights and HiLo transformation (reference) versus different weights and streamflow transformations (alternative) for a) droughts, b) floods, and c) transitions. Each alternative is compared with its unweighted analogs and HiLo transformation. Differences are calculated as "reference - alternative" with values above (below) 0 indicating better (worse) performance of the reference (alternative). Supplementary figure associated to Figure 5b in the main manuscript.

**Figure S5: Spearman's rank correlation coefficient between catchment attributes and  $\Delta$ CSI for weighted cases with respect to the unweighted reference**

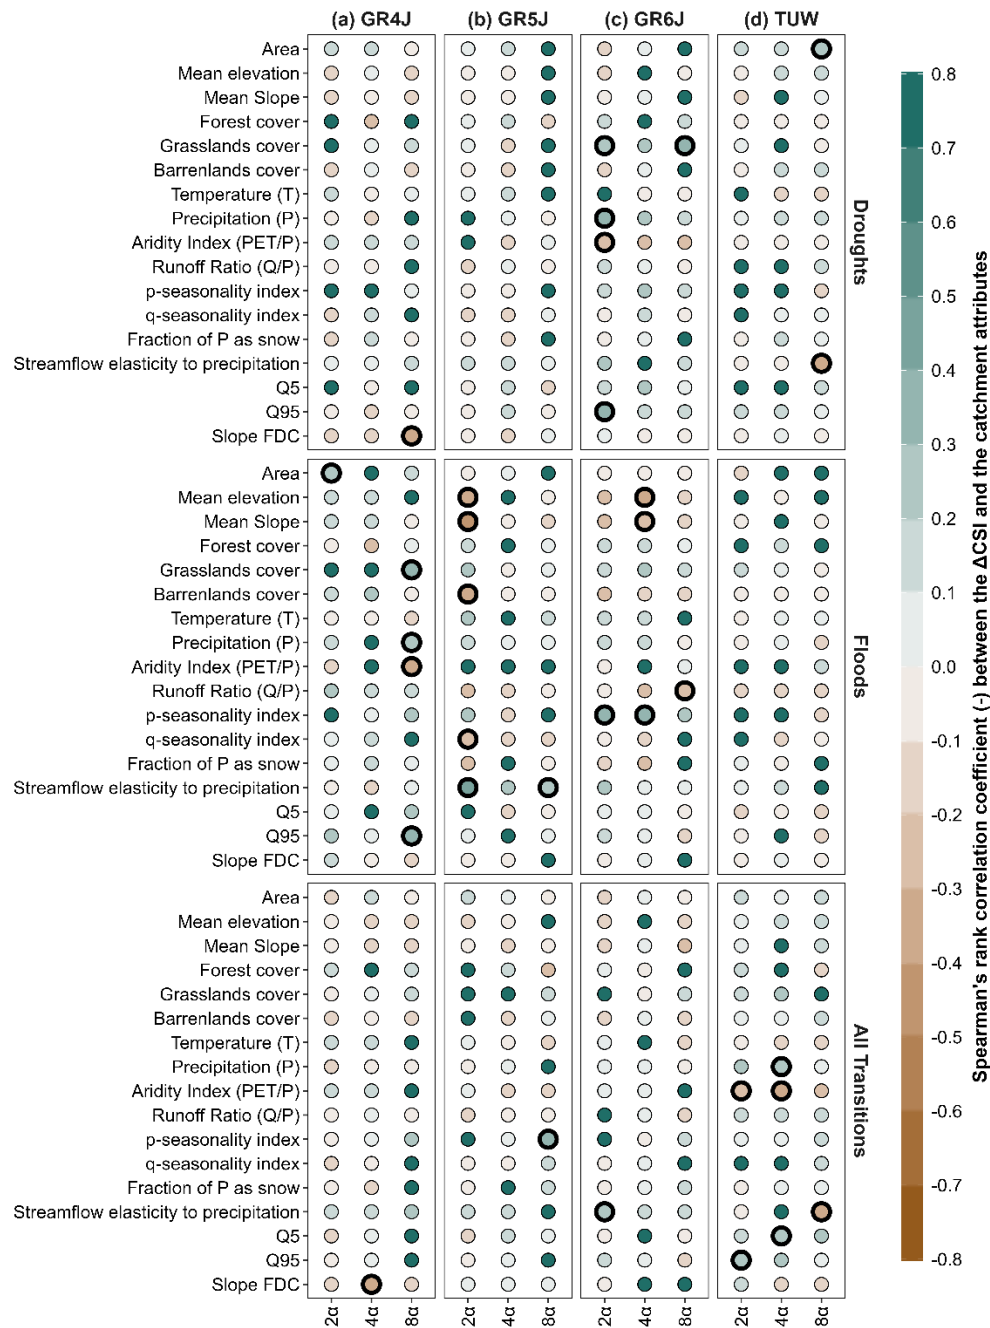

Figure S5: Spearman's rank correlation coefficient between catchment attributes and  $\Delta$ CSI in detecting droughts, floods, and drought-to-flood transitions (rows) when weights are used in the HiLo original KGE formulations to calibrate the (a) GR4J, (b) GR5J, (c) GR6J, (d) TUV hydrological models (columns). The circles with thick outlines indicate statistically significant correlation coefficients at a 5% level. Positive correlations indicate that the greater the values of the attribute, the unweight case is better in comparison with the alternatives (i.e., use of weights; x-axis).

**Figure S6: Performance by using no weights HiLo case with different KGE formulation as objective function for calibration**

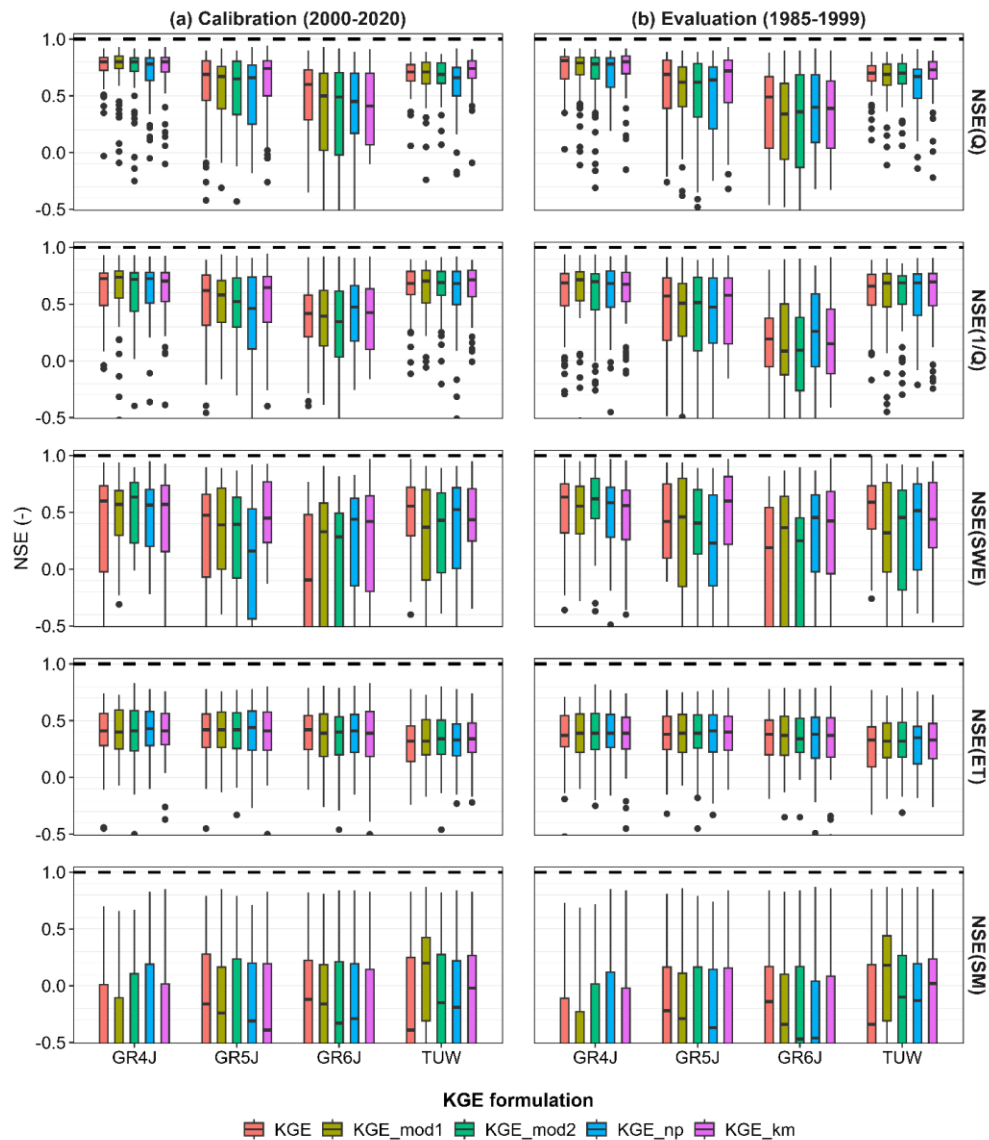

Figure S6: NSE computes for high and low flows (i.e., Q and 1/Q), snow water equivalent (SWE), actual evapotranspiration (ET), and surface soil moisture (SM) for the (a) calibration, and (b) evaluation period. The modeling results are associated with the GR4J, GR5J, GR6J, and TUW hydrological models calibrated using no weights Hilo case and different KGE formulations (used as reference in the main manuscript). The dashed black line represents the optimum value for the assessed metric.



**Figure S7: Bias in hydrological signatures by using no weights HiLo case with different KGE formulation as objective function for calibration**

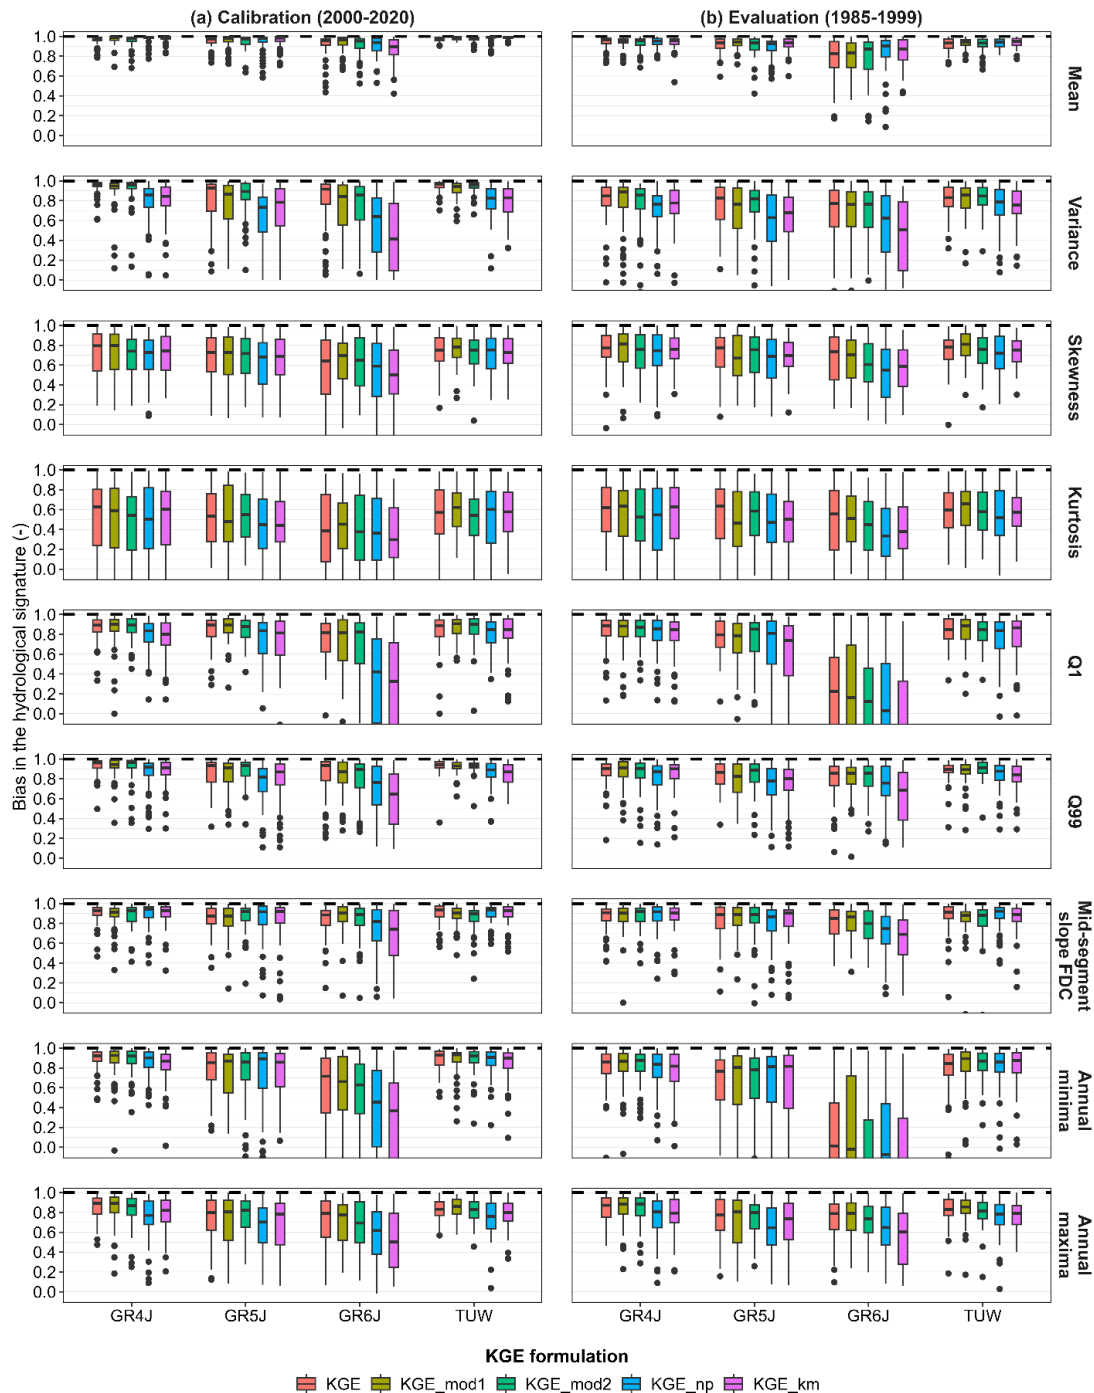

Figure S7: Bias in hydrological signatures computes for streamflow for the (a) calibration and (b) evaluation period. The modeling results are associated with the GR4J, GR5J, GR6J, and TUW hydrological models calibrated using no weights Hilo case and different KGE formulations (used as reference in the main manuscript). The dashed black lines represent the optimum values for the assessed metrics.

**Figure S8: Correlation between observed and simulated variables using no weights HiLo case with different KGE formulation as objective function for calibration**

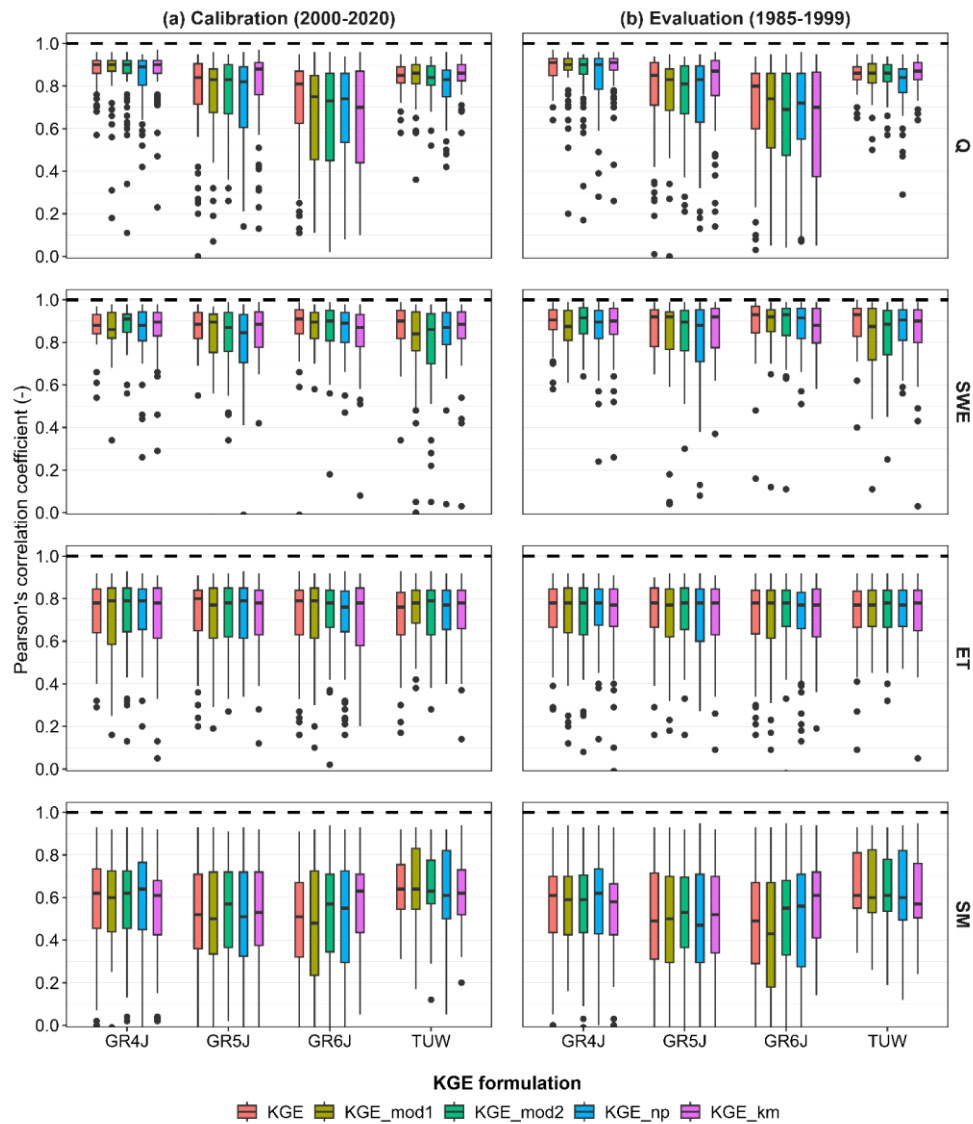

Figure S8: Pearson's correlation coefficient between observed and simulated streamflow (Q), snow water equivalent (SWE), actual evapotranspiration (ET), and surface soil moisture (SM) computed for the (a) calibration and (b) evaluation period. The modeling results are associated with the GR4J, GR5J, GR6J, and TUV hydrological models calibrated using no weights Hilo case and different KGE formulations (used as reference in the main manuscript). The dashed black lines represent the optimum values for the assessed metrics.

**Figure S9: Difference in the CSI by using no weights HiLo case (reference) and different weights and streamflow transformations (alternative) for different hydrological models**

**a) KGE configurations compared to unweighted HiLo case**

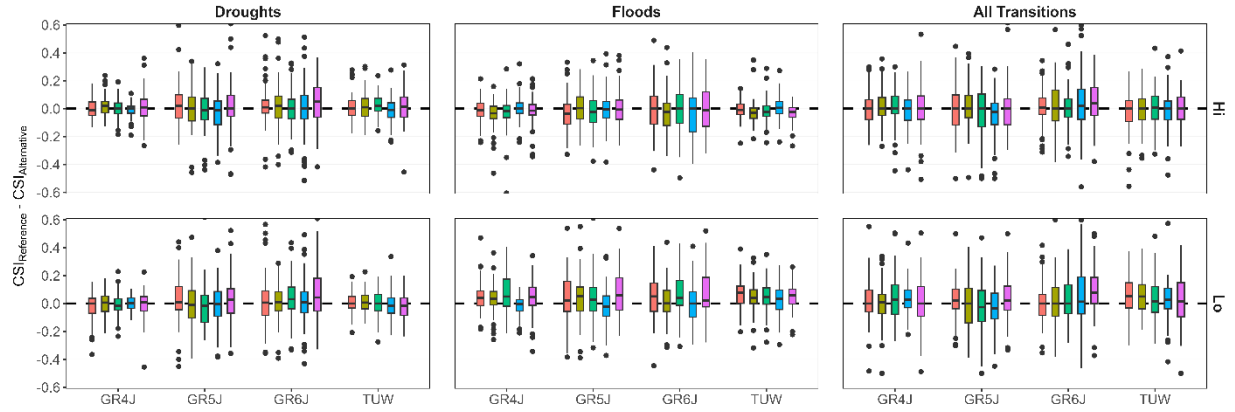

**b) KGE configurations compared to unweighted HiLo case and original KGE formulation**

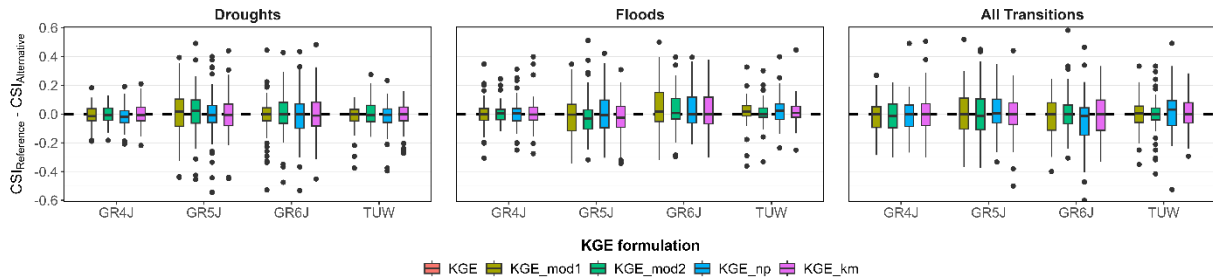

Figure S9: Difference in the Critical Success Index (CSI) for simulations given no weights and HiLo streamflow transformation (reference) and the application of differences weights and streamflow transformation (alternative). In a) each alternative is compared with its unweighted HiLo analogue, while in b) comparisons include both unweighted HiLo analogs and the original KGE formulation as reference. The difference has been calculated as "reference - alternative" which means that values higher (lower) than 0 represent a better (worst) performance of the reference (alternative) simulating high-flows (NSE(Q)), low-flows (NSE(1/Q)), snow water equivalent (NSE(SWE)), actual evapotranspiration (NSE(ET)), and surface soil moisture (NSE(SM)). Supplementary figure associated to Figure 6 in the main manuscript.

**Figure S10: Difference in the NSE by using no weights HiLo case (reference) and different weights and streamflow transformations (alternative) for different hydrological models**

**a) KGE configurations compared to unweighted HiLo case**

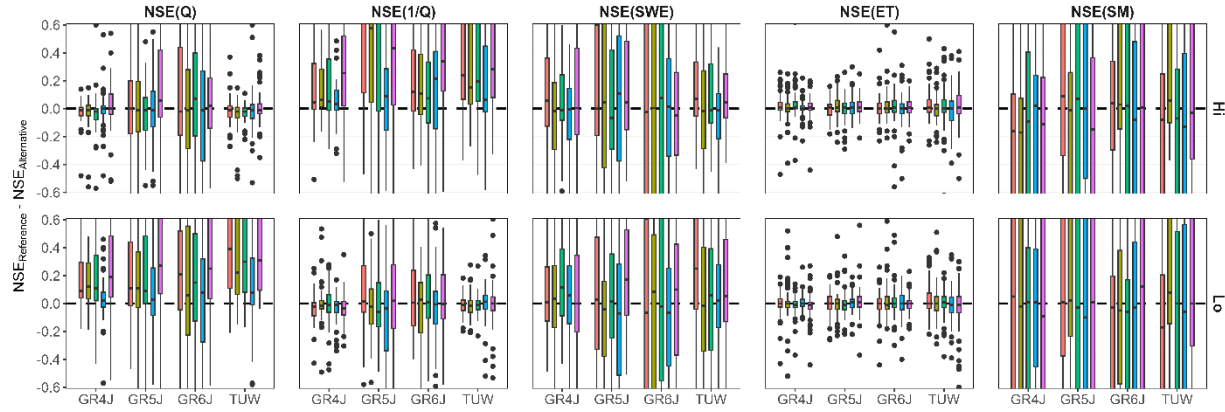

**b) KGE configurations compared to unweighted HiLo case and original KGE formulation**

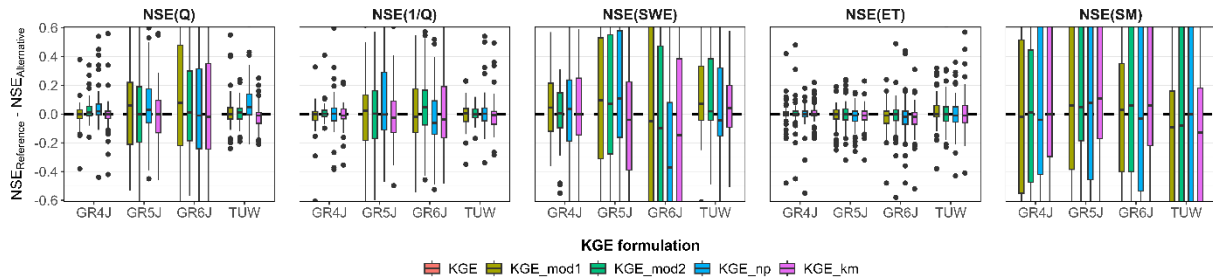

Figure S10: Difference in the Nash-Sutcliffe Efficiency (NSE) for simulations given no weights and HiLo streamflow transformation (reference) and the application of differences weights and streamflow transformation (alternative). In a) each alternative is compared with its unweighted HiLo analogue, while in b) comparisons include both unweighted HiLo analogs and the original KGE formulation as reference. The difference has been calculated as "reference - alternative" which means that values higher (lower) than 0 represent a better (worst) performance of the reference (alternative) simulating high-flows (NSE(Q)), low-flows (NSE(1/Q)), snow water equivalent (NSE(SWE)), actual evapotranspiration (NSE(ET)), and surface soil moisture (NSE(SM)). Supplementary figure associated to Figure 6 in the main manuscript.

**Figure S11: CSI per streamflow extreme, objective function, hydrological model and country**

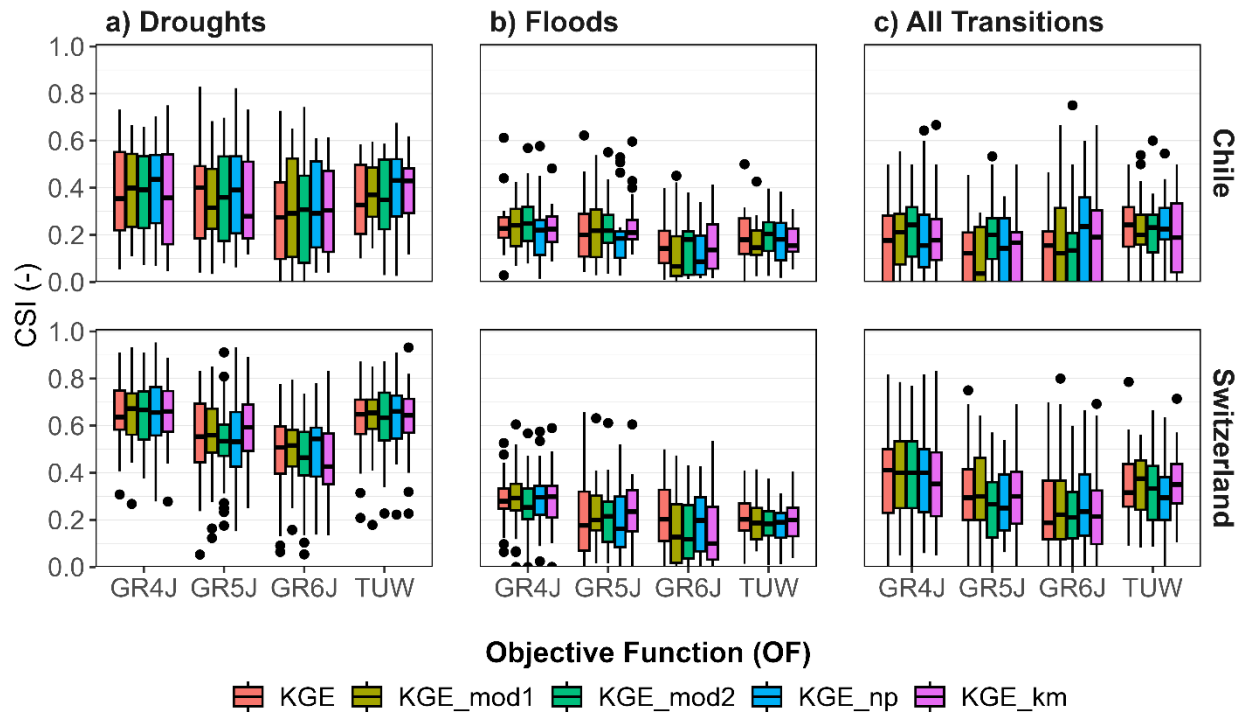

Figure S11: Critical Success Index (CSI) for a) droughts, b) floods, and c) drought-to-flood transitions, based on the simulations with GR4J, GR5J, GR6J, and TUW calibrated with different unweighted HiLo KGE formulations as objective functions for Chile and Switzerland (upper and lower panels respectively). Supplementary figure associated to Figure 7 in the main manuscript.

**Figure S12: Results of the ANOVA applied to categorical indices and hydrological variables**

**a) Results of the ANOVA applied to the categorical indices for streamflow extremes**

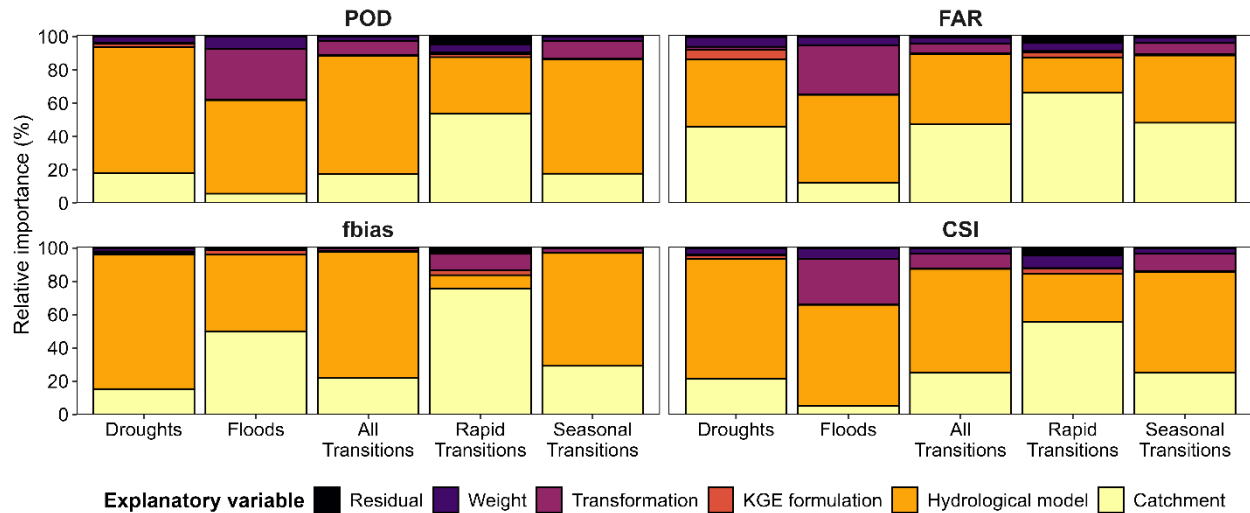

**b) Results of the ANOVA applied to the NSE associate to different hydrological variables**

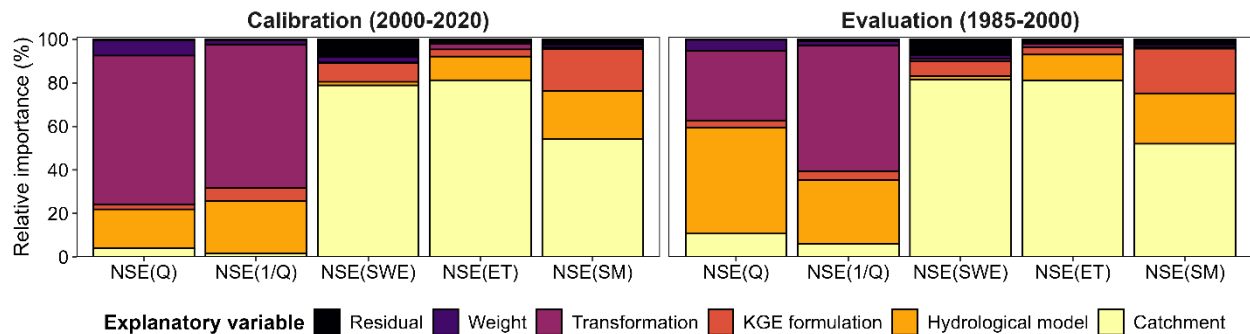

Figure S12: Results of the analysis of variance (ANOVA) applied to a) probability of detection (POD =  $H/H+M$ ), false alarm ratio (FAR =  $F/H+F$ ), frequency bias (fbias =  $H+F/H+M$ ), critical success index (CSI =  $H/H+M+F$ ) for droughts, floods, all drought-flood transitions (i.e., rapid and seasonal), rapid transitions, and seasonal transitions, and b) the Nash-Sutcliffe Efficiency (NSE) associate to high and low-flows (Q and 1/Q respectively), snow water equivalent (SWE), actual evapotranspiration (ET), and surface soil moisture (SM). Supplementary figure associated to Figure 10 in the main manuscript.

**Figure S13: Correlation between CSI and catchment attributes**

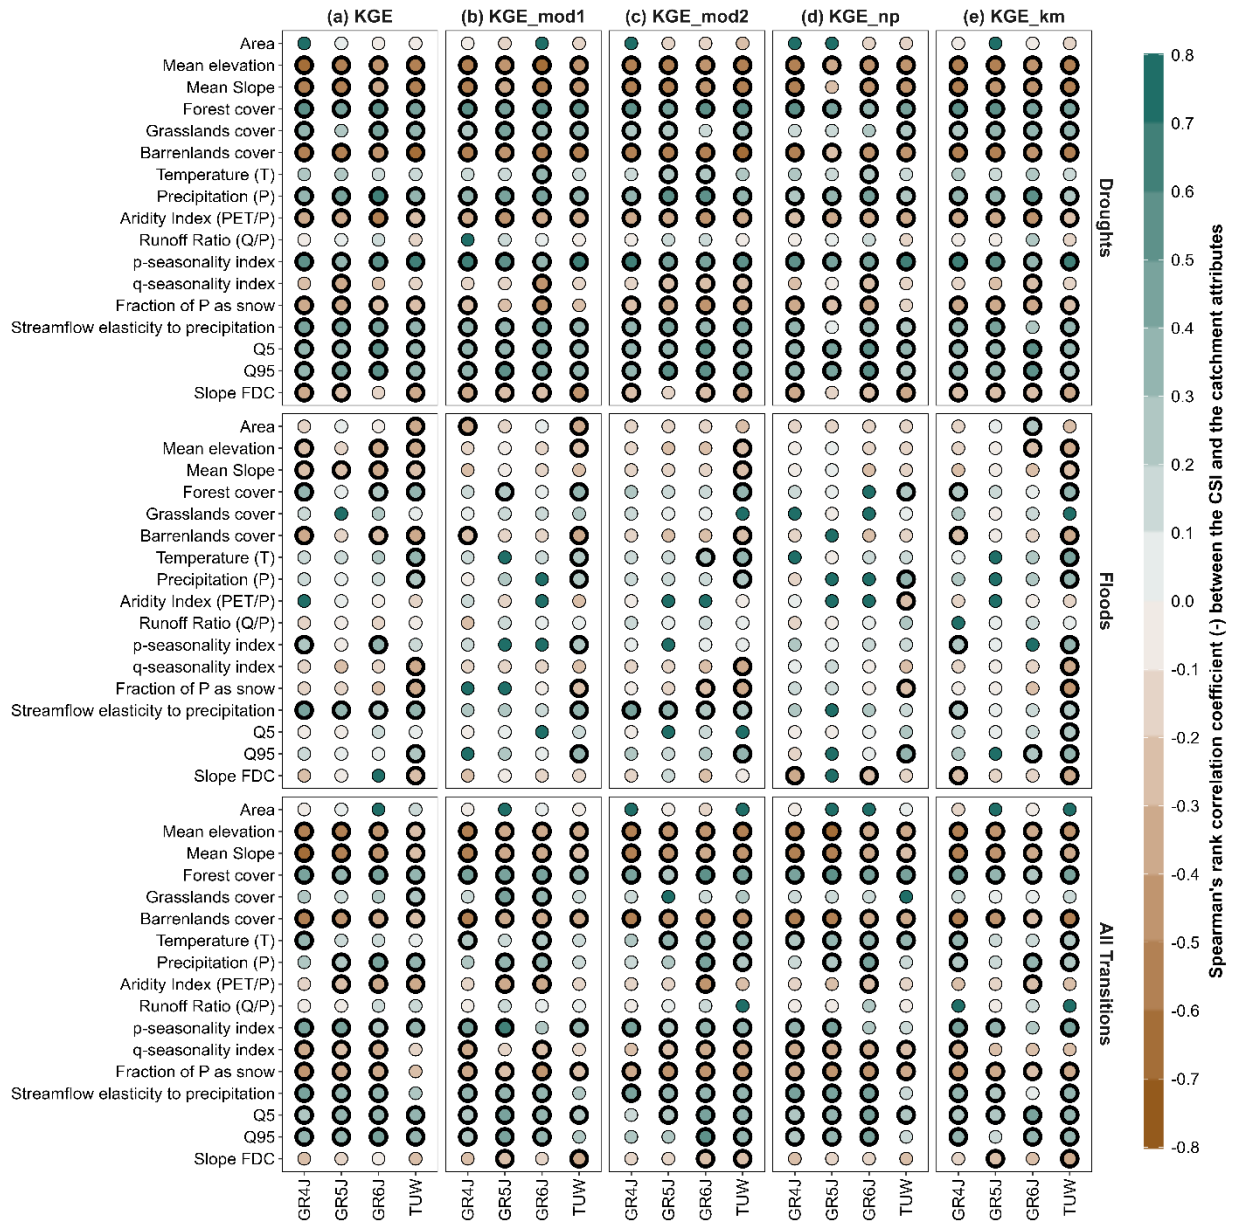

Figure S13: Correlation between CSI and catchment attributes based on results associated to different unweighted HiLo KGE formulations used as objective functions (columns) and streamflow extremes (rows). Supplementary figure associated to Figure 9 in the main manuscript.

**Figure S14: Parameter agreement for the calibrated model.**

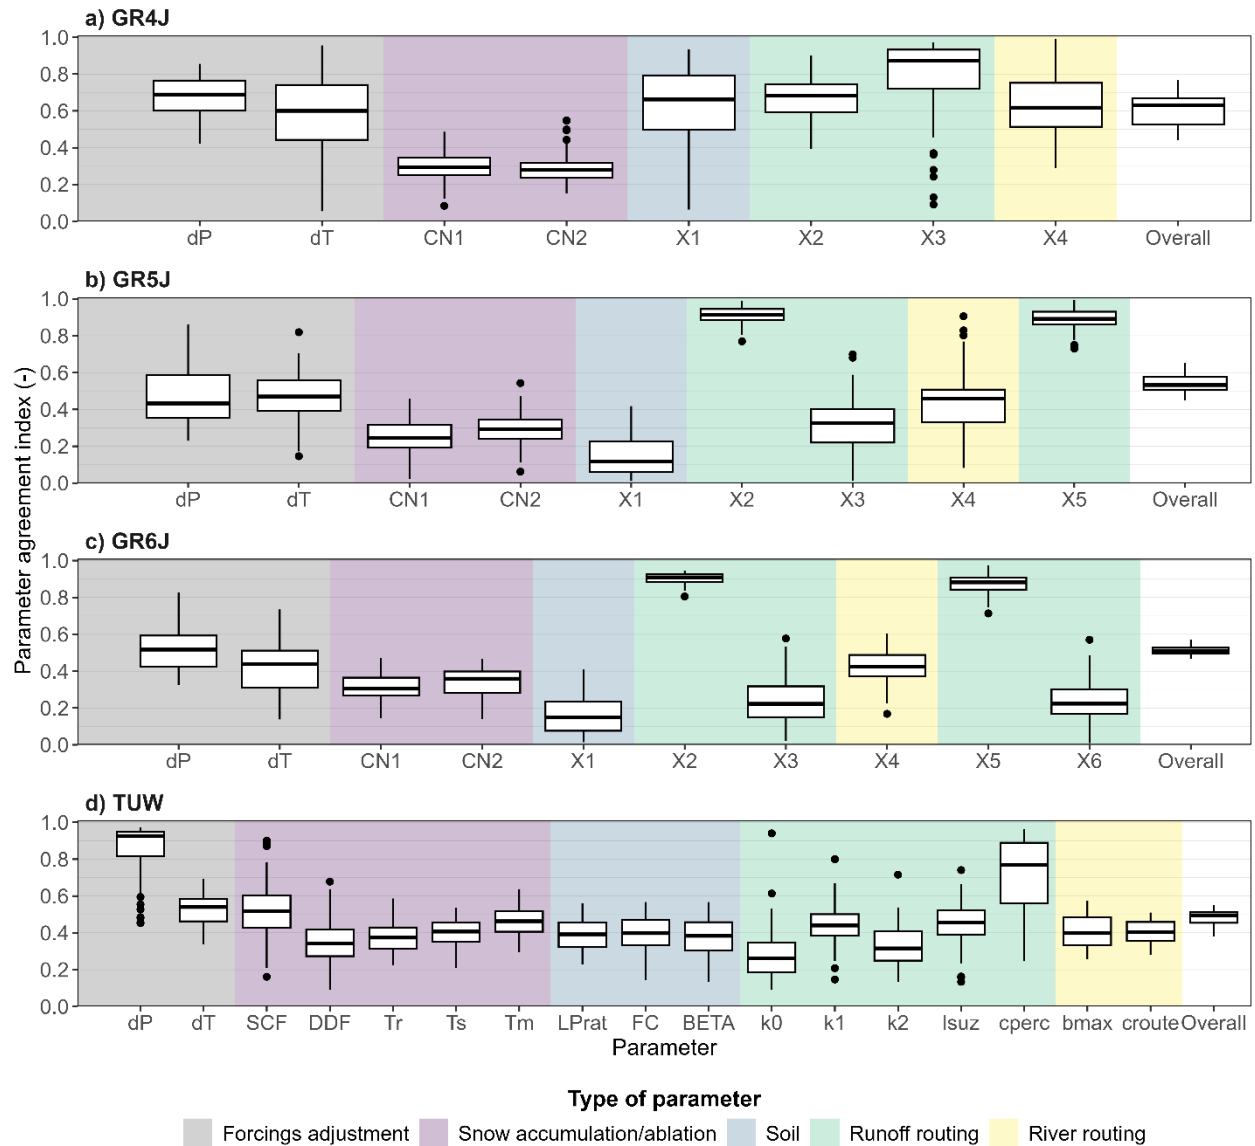

Figure S14: Parameter agreement in a) GR4J, b) GR5J, c) GR6J, and d) TUW models. (Lower) Higher values in the parameter agreement index indicates (dis)agreement in the values of the parameter (i.e., more dispersion between the optimal parameter sets obtained from different calibration processes). Each boxplot comprises agreement indices from the 63 catchments included in the study domain. The parameter agreement index for each parameter and catchment – as well as the overall agreement index - has been computed using the metric proposed by Muñoz-Castro et al. (2023)<sup>1</sup>.

<sup>1</sup> Muñoz-Castro, E., Mendoza, P. A., Vásquez, N., & Vargas, X. (2023). Exploring parameter (dis) agreement due to calibration metric selection in conceptual rainfall–runoff models. *Hydrological Sciences Journal*, 68(12), 1754-1768.



**Figure S15: Relative importance of parameters explaining the total variance of the critical the CSI associated with drought, floods, and drought-to-flood transitions**

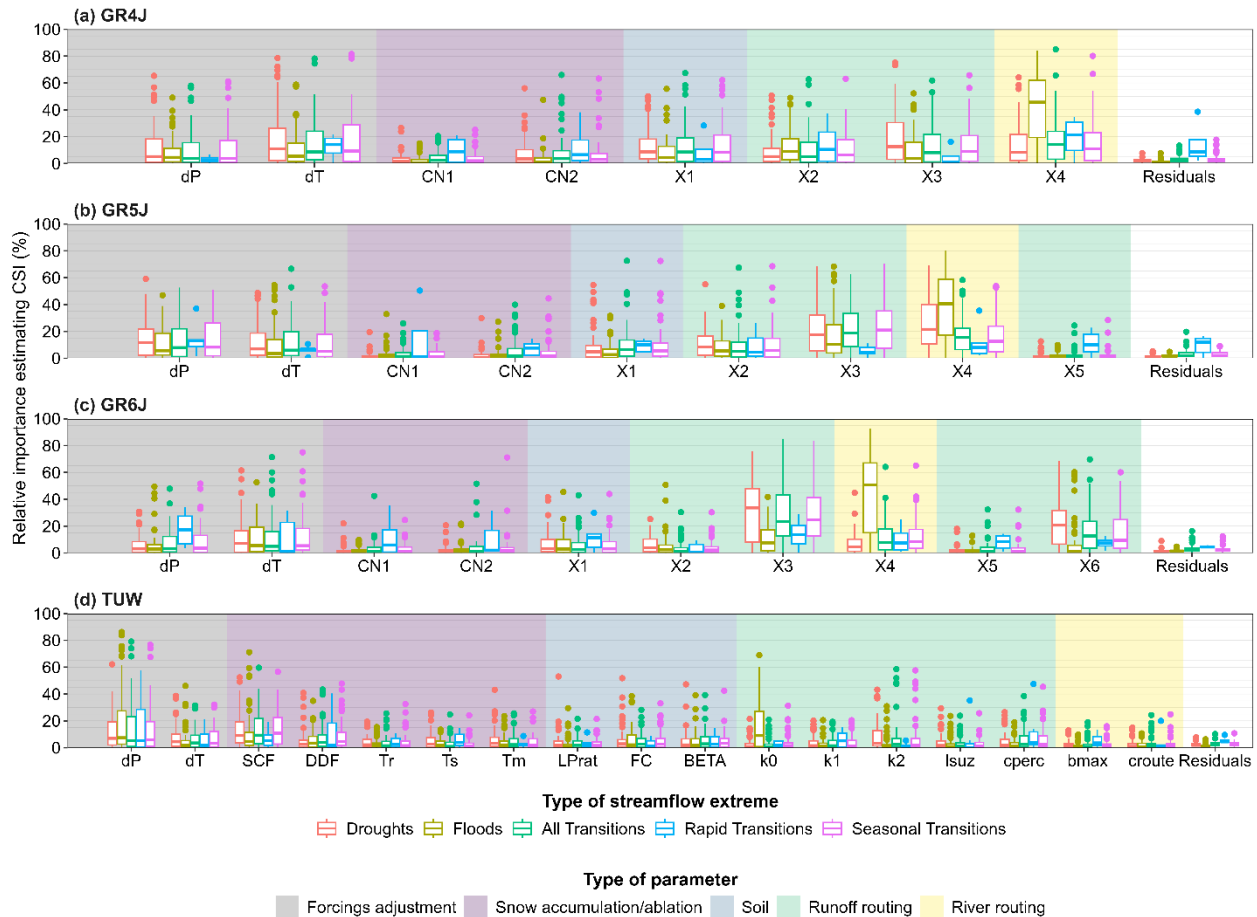

Figure S15: Relative importance of parameters for explaining the Critical Success Index (CSI) for models (a) GR4J, (b) GR5J, (c) GR6J, and (d) TUW based on the results of an analysis of variance (ANOVA). Extended version of Figure 11 in the main manuscript.

**Figure S16: Relative importance of bias in hydrological signatures explaining the total variance of the critical success index (CSI) associated with drought, floods, and drought-to-flood transitions**

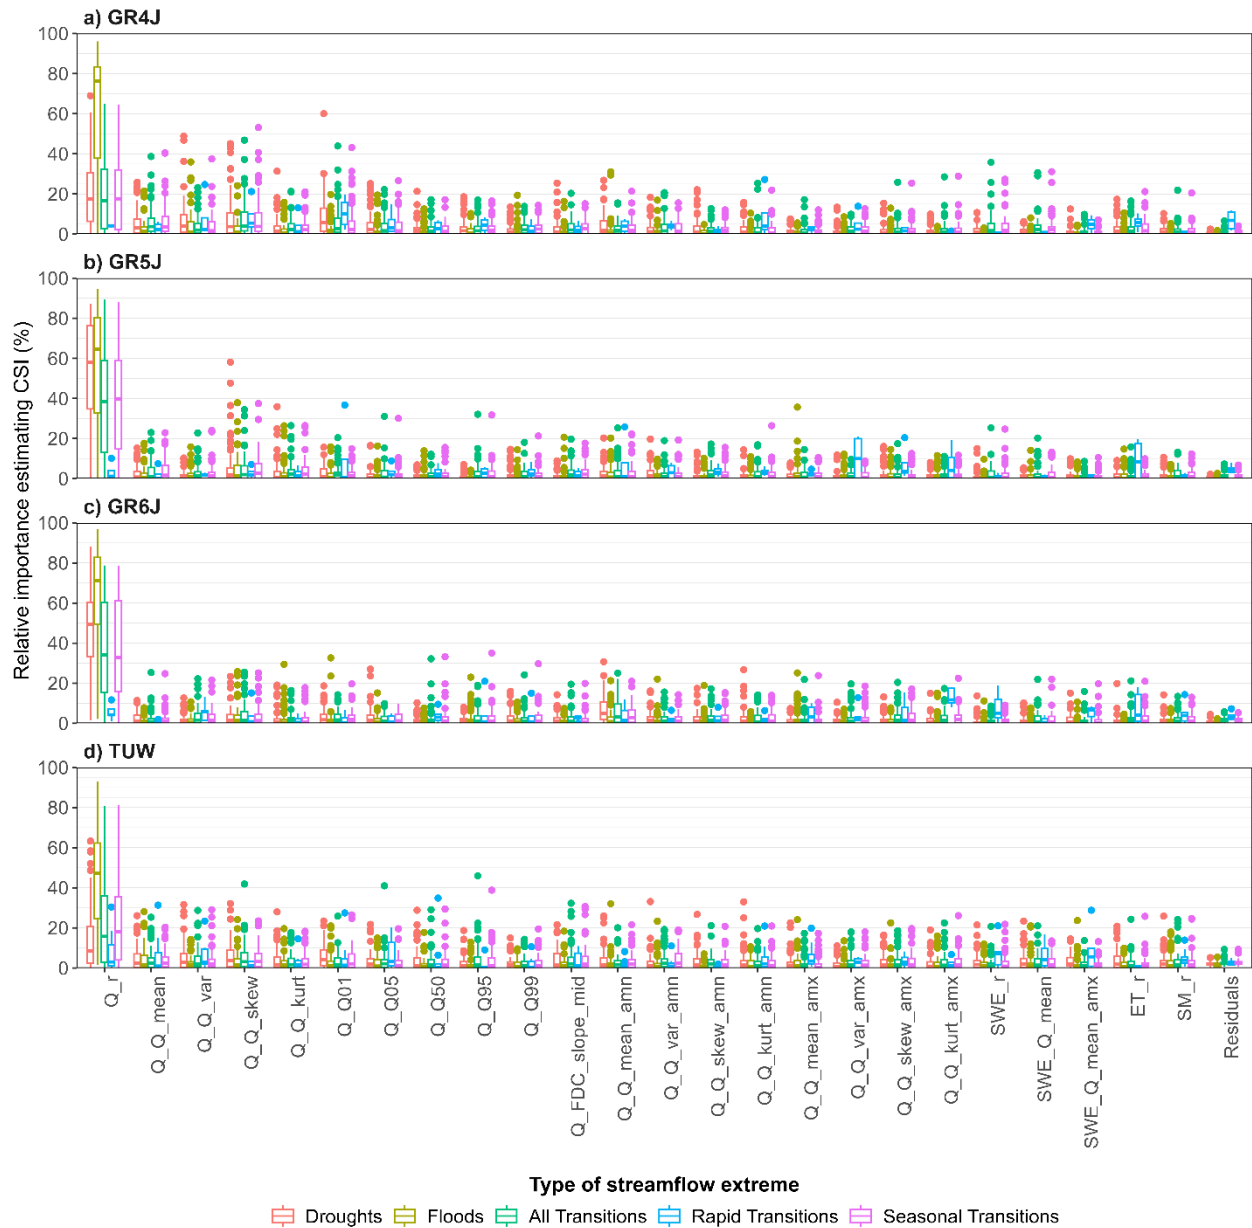

Figure S16: Relative importance of bias in hydrological signatures explaining the total variance of the critical success index (CSI) associated with drought, floods, and drought-to-flood transitions. Q, SWE, ET, and SM represent streamflow, snow water equivalent, actual evapotranspiration, and surface soil moisture respectively. Abbreviations used for the hydrological signatures computed are summarized in Table S1.

**Figure S17: Spearman's rank correlation between the relative importance of model parameters and catchment attributes**

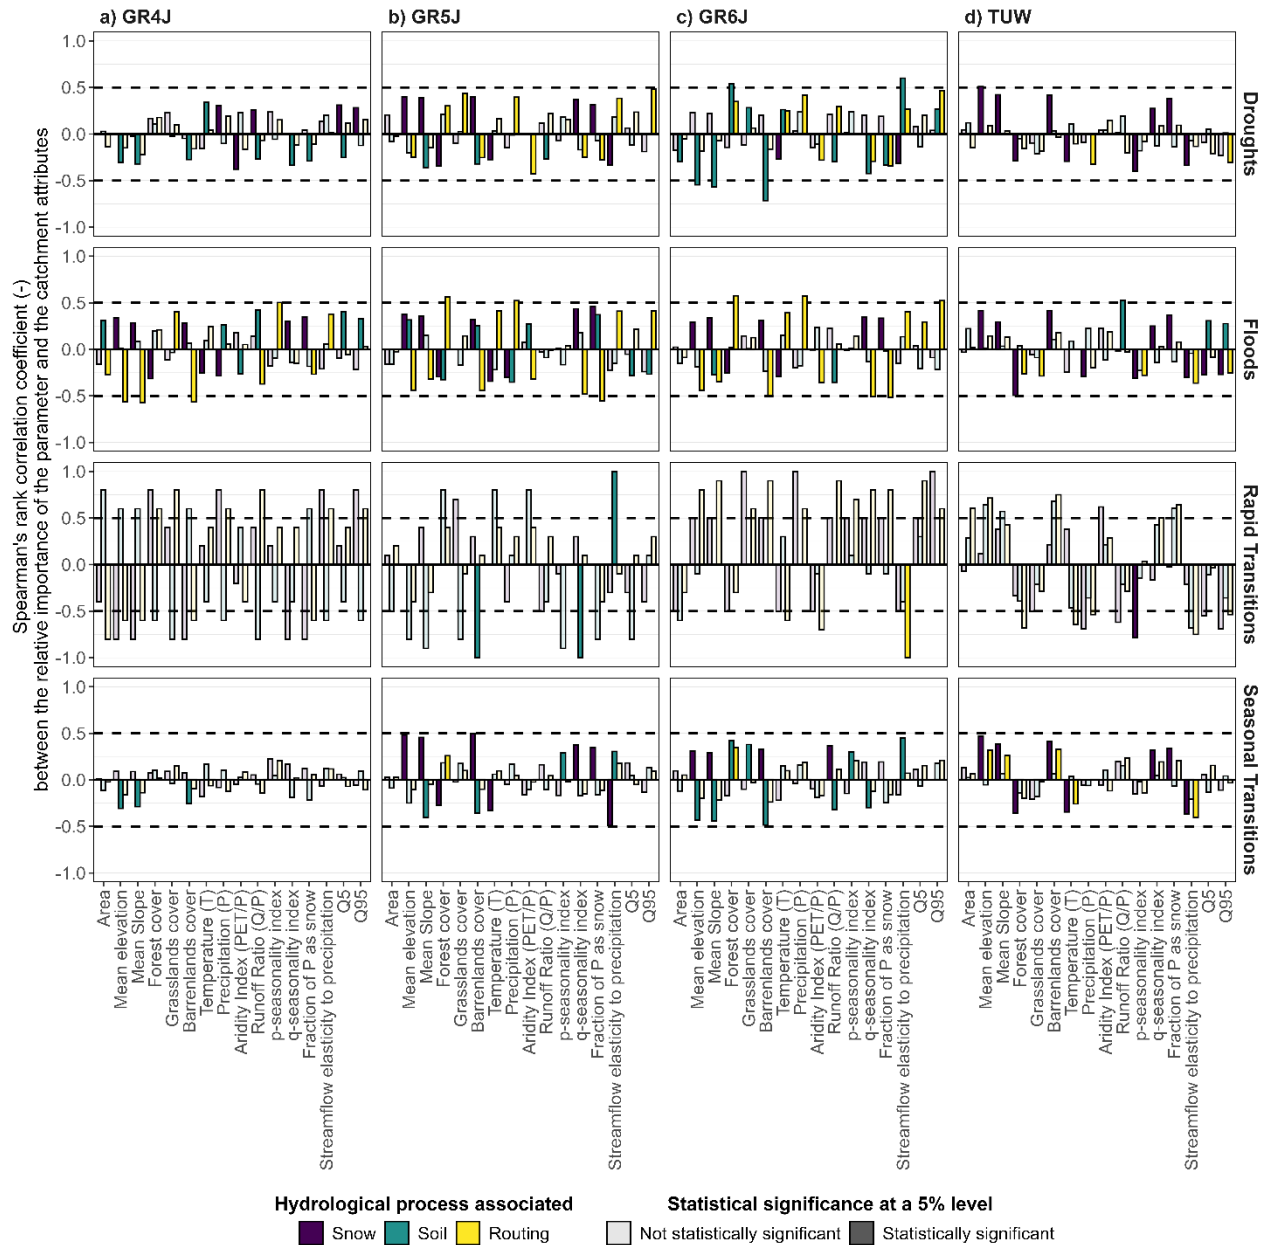

Figure S17: Spearman's rank correlation between the relative importance of model parameters and catchment attributes.

**Figure S18: Bias between simulated and observed streamflow extreme events computed at the event scale**

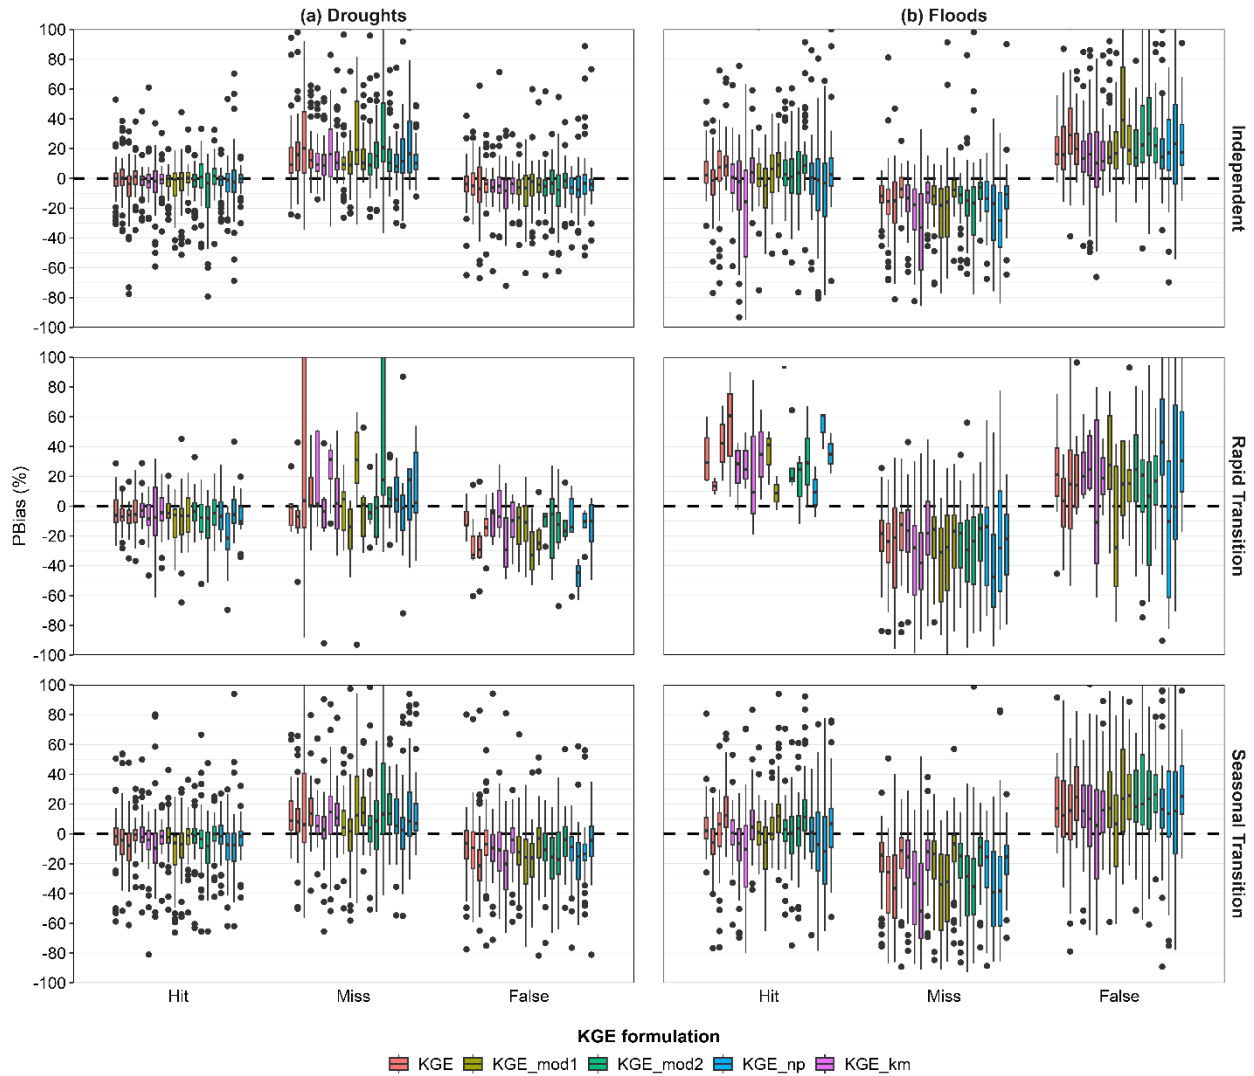

Figure S18: Percentage bias (PBias) between simulated and observed runoff during (a) droughts and (b) floods identified as independent events, rapid transitions, and seasonal transitions, and classified as hit, miss, or false depending on the model's ability to capture them. The modeling results are associated with the GR4J, GR5J, GR6J, and TUW hydrological models calibrated using no weights Hilo case and different KGE formulations (used as reference in the main manuscript). For each KGE formulation there are 4 boxes per category, which correspond to the results obtained for the GR4J, GR5J, GR6J and TUW models respectively. The dashed black lines represent the optimum values for the assessed metrics.

**Table S1: Hydrological signatures computed**

Table S1: Hydrological signatures computed (used in Figures S7, S8, and S16).

| Hydrological signature                                    | Abbreviation  |
|-----------------------------------------------------------|---------------|
| Temporal dynamic between observed and simulated values    | r             |
| Mean of the daily serie                                   | mean          |
| Variance of the daily serie                               | var           |
| Skewness of the daily serie                               | skew          |
| Kurtosis of the daily serie                               | kurt          |
| 1st percentile of the daily serie                         | Q01           |
| 5th percentile of the daily serie                         | Q05           |
| 50th percentile of the daily serie                        | Q50           |
| 95th percentile of the daily serie                        | Q95           |
| 99th percentile of the daily serie                        | Q99           |
| Slope of the mid-segment of the flow duration curve (FDC) | FDC_slope_mid |
| Mean of the annual minima serie                           | mean_amn      |
| Variance of the annual minima serie                       | var_amn       |
| Skewness of the annual minima serie                       | skew_amn      |
| Kurtosis of the annual minima serie                       | kurt_amn      |
| Mean of the annual maxima serie                           | mean_amx      |
| Variance of the annual maxima serie                       | var_amx       |
| Skewness of the annual maxima serie                       | skew_amx      |
| Kurtosis of the annual maxima serie                       | kurt_amx      |

**Table S2: Catchments and configurations with CSI higher than zero for rapid drought-to-flood transitions**

Table S2: Catchments and configurations where CSI values greater than zero are obtained for rapid drought-to-flood transitions. Those corresponding to unweighted HiLo, used as reference in the main manuscript, are highlighted in light blue.

| id_gauge | Type  | POD  | fbias | FAR  | CSI  | Country | Model | OF_name  | Case | w          |
|----------|-------|------|-------|------|------|---------|-------|----------|------|------------|
| 4311001  | Rapid | 1.00 | 2.00  | 0.50 | 0.50 | Chile   | TUW   | KGE_np   | Hi   | 1 $\alpha$ |
|          | Rapid | 1.00 | 2.00  | 0.50 | 0.50 | Chile   | TUW   | KGE_np   | HiLo | 1 $\alpha$ |
|          | Rapid | 1.00 | 2.00  | 0.50 | 0.50 | Chile   | TUW   | KGE_np   | HiLo | 2 $\alpha$ |
|          | Rapid | 1.00 | 1.00  | 0.00 | 1.00 | Chile   | TUW   | KGE_km   | HiLo | 2 $\alpha$ |
|          | Rapid | 1.00 | 1.00  | 0.00 | 1.00 | Chile   | TUW   | KGE_np   | Hi   | 4 $\alpha$ |
| 4314002  | Rapid | 1.00 | 2.00  | 0.50 | 0.50 | Chile   | TUW   | KGE_np   | Lo   | 1 $\alpha$ |
|          | Rapid | 1.00 | 3.00  | 0.67 | 0.33 | Chile   | TUW   | KGE_mod2 | Hi   | 8 $\alpha$ |
|          | Rapid | 1.00 | 1.00  | 0.00 | 1.00 | Chile   | TUW   | KGE_km   | Lo   | 8 $\alpha$ |
|          | Rapid | 1.00 | 1.00  | 0.00 | 1.00 | Chile   | TUW   | KGE_np   | HiLo | 8 $\alpha$ |
| 4320001  | Rapid | 1.00 | 3.00  | 0.67 | 0.33 | Chile   | GR4J  | KGE_np   | Hi   | 1 $\alpha$ |
|          | Rapid | 1.00 | 1.00  | 0.00 | 1.00 | Chile   | GR4J  | KGE_mod1 | Hi   | 4 $\alpha$ |
|          | Rapid | 1.00 | 1.00  | 0.00 | 1.00 | Chile   | TUW   | KGE_mod1 | Lo   | 2 $\alpha$ |
|          | Rapid | 1.00 | 1.00  | 0.00 | 1.00 | Chile   | TUW   | KGE_km   | Lo   | 2 $\alpha$ |
|          | Rapid | 1.00 | 2.00  | 0.50 | 0.50 | Chile   | TUW   | KGE_np   | Hi   | 4 $\alpha$ |
|          | Rapid | 1.00 | 1.00  | 0.00 | 1.00 | Chile   | TUW   | KGE_km   | Lo   | 4 $\alpha$ |
|          | Rapid | 1.00 | 3.00  | 0.67 | 0.33 | Chile   | TUW   | KGE_mod1 | HiLo | 8 $\alpha$ |
| 5716001  | Rapid | 1.00 | 1.00  | 0.00 | 1.00 | Chile   | GR6J  | KGE_km   | HiLo | 4 $\alpha$ |
|          | Rapid | 1.00 | 1.00  | 0.00 | 1.00 | Chile   | TUW   | KGE_np   | Lo   | 1 $\alpha$ |
|          | Rapid | 1.00 | 2.00  | 0.50 | 0.50 | Chile   | TUW   | KGE      | Lo   | 2 $\alpha$ |
|          | Rapid | 1.00 | 1.00  | 0.00 | 1.00 | Chile   | TUW   | KGE_mod1 | Lo   | 2 $\alpha$ |
|          | Rapid | 1.00 | 1.00  | 0.00 | 1.00 | Chile   | TUW   | KGE_mod2 | Lo   | 2 $\alpha$ |
|          | Rapid | 1.00 | 1.00  | 0.00 | 1.00 | Chile   | TUW   | KGE_km   | Lo   | 2 $\alpha$ |
|          | Rapid | 1.00 | 1.00  | 0.00 | 1.00 | Chile   | TUW   | KGE_np   | HiLo | 2 $\alpha$ |
|          | Rapid | 1.00 | 1.00  | 0.00 | 1.00 | Chile   | TUW   | KGE_mod2 | Lo   | 8 $\alpha$ |
|          | Rapid | 1.00 | 1.00  | 0.00 | 1.00 | Chile   | TUW   | KGE_km   | Lo   | 8 $\alpha$ |
|          | Rapid | 1.00 | 1.00  | 0.00 | 1.00 | Chile   | TUW   | KGE      | HiLo | 8 $\alpha$ |
| 8358001  | Rapid | 1.00 | 1.00  | 0.00 | 1.00 | Chile   | GR5J  | KGE_km   | Hi   | 8 $\alpha$ |
|          | Rapid | 1.00 | 1.00  | 0.00 | 1.00 | Chile   | GR6J  | KGE      | Hi   | 8 $\alpha$ |
|          | Rapid | 1.00 | 1.00  | 0.00 | 1.00 | Chile   | TUW   | KGE      | Lo   | 2 $\alpha$ |
| 9104001  | Rapid | 1.00 | 1.00  | 0.00 | 1.00 | Chile   | GR4J  | KGE      | HiLo | 1 $\alpha$ |
|          | Rapid | 1.00 | 1.00  | 0.00 | 1.00 | Chile   | GR4J  | KGE_mod2 | HiLo | 2 $\alpha$ |
|          | Rapid | 1.00 | 1.00  | 0.00 | 1.00 | Chile   | GR4J  | KGE      | HiLo | 4 $\alpha$ |
|          | Rapid | 1.00 | 1.00  | 0.00 | 1.00 | Chile   | GR4J  | KGE_mod2 | HiLo | 4 $\alpha$ |
|          | Rapid | 1.00 | 1.00  | 0.00 | 1.00 | Chile   | GR4J  | KGE      | HiLo | 8 $\alpha$ |
|          | Rapid | 1.00 | 1.00  | 0.00 | 1.00 | Chile   | GR5J  | KGE_mod2 | Lo   | 8 $\alpha$ |
|          | Rapid | 1.00 | 1.00  | 0.00 | 1.00 | Chile   | TUW   | KGE_mod1 | Lo   | 2 $\alpha$ |
|          | Rapid | 1.00 | 2.00  | 0.50 | 0.50 | Chile   | TUW   | KGE      | Lo   | 4 $\alpha$ |
|          | Rapid | 1.00 | 2.00  | 0.50 | 0.50 | Chile   | TUW   | KGE      | Lo   | 8 $\alpha$ |
|          | Rapid | 1.00 | 1.00  | 0.00 | 1.00 | Chile   | TUW   | KGE_mod2 | Lo   | 8 $\alpha$ |
|          | Rapid | 1.00 | 1.00  | 0.00 | 1.00 | Chile   | TUW   | KGE_np   | Lo   | 8 $\alpha$ |

| id_gauge | Type  | POD  | fbias | FAR  | CSI  | Country     | Model | OF_name  | Case | w          |
|----------|-------|------|-------|------|------|-------------|-------|----------|------|------------|
|          | Rapid | 1.00 | 1.00  | 0.00 | 1.00 | Chile       | TUW   | KGE_mod1 | HiLo | 8 $\alpha$ |
| 9127001  | Rapid | 1.00 | 2.00  | 0.50 | 0.50 | Chile       | TUW   | KGE_km   | HiLo | 4 $\alpha$ |
| 2606     | Rapid | 0.50 | 0.50  | 0.00 | 0.50 | Switzerland | GR4J  | KGE_mod2 | HiLo | 1 $\alpha$ |
| 2151     | Rapid | 1.00 | 3.00  | 0.67 | 0.33 | Switzerland | GR5J  | KGE_mod2 | Lo   | 2 $\alpha$ |
| 2029     | Rapid | 1.00 | 3.00  | 0.67 | 0.33 | Switzerland | GR5J  | KGE_mod1 | Hi   | 4 $\alpha$ |
|          | Rapid | 1.00 | 1.00  | 0.00 | 1.00 | Switzerland | GR5J  | KGE_mod2 | Lo   | 4 $\alpha$ |
|          | Rapid | 1.00 | 3.00  | 0.67 | 0.33 | Switzerland | GR5J  | KGE_mod1 | Lo   | 8 $\alpha$ |
|          | Rapid | 1.00 | 1.00  | 0.00 | 1.00 | Switzerland | GR5J  | KGE_km   | Lo   | 8 $\alpha$ |
|          | Rapid | 1.00 | 1.00  | 0.00 | 1.00 | Switzerland | GR5J  | KGE_mod1 | HiLo | 8 $\alpha$ |
|          | Rapid | 1.00 | 3.00  | 0.67 | 0.33 | Switzerland | GR6J  | KGE      | Hi   | 1 $\alpha$ |
|          | Rapid | 1.00 | 1.00  | 0.00 | 1.00 | Switzerland | GR6J  | KGE_np   | Lo   | 2 $\alpha$ |
|          | Rapid | 1.00 | 1.00  | 0.00 | 1.00 | Switzerland | GR6J  | KGE_mod1 | Hi   | 8 $\alpha$ |
|          | Rapid | 1.00 | 2.00  | 0.50 | 0.50 | Switzerland | GR6J  | KGE_mod2 | HiLo | 8 $\alpha$ |
| 2110     | Rapid | 1.00 | 2.00  | 0.50 | 0.50 | Switzerland | TUW   | KGE_km   | Hi   | 8 $\alpha$ |
| 2099     | Rapid | 0.50 | 1.00  | 0.50 | 0.33 | Switzerland | GR6J  | KGE      | Hi   | 2 $\alpha$ |
| 2018     | Rapid | 0.50 | 0.50  | 0.00 | 0.50 | Switzerland | GR4J  | KGE_km   | Hi   | 1 $\alpha$ |
|          | Rapid | 0.50 | 0.50  | 0.00 | 0.50 | Switzerland | GR4J  | KGE      | Hi   | 2 $\alpha$ |
|          | Rapid | 0.50 | 0.50  | 0.00 | 0.50 | Switzerland | GR4J  | KGE_mod2 | Hi   | 2 $\alpha$ |
|          | Rapid | 0.50 | 0.50  | 0.00 | 0.50 | Switzerland | GR4J  | KGE_km   | Hi   | 2 $\alpha$ |
|          | Rapid | 0.50 | 0.50  | 0.00 | 0.50 | Switzerland | GR4J  | KGE_mod1 | HiLo | 4 $\alpha$ |
|          | Rapid | 0.50 | 0.50  | 0.00 | 0.50 | Switzerland | GR5J  | KGE      | Hi   | 1 $\alpha$ |
|          | Rapid | 0.50 | 0.50  | 0.00 | 0.50 | Switzerland | GR5J  | KGE_mod2 | Hi   | 4 $\alpha$ |
|          | Rapid | 0.50 | 0.50  | 0.00 | 0.50 | Switzerland | GR5J  | KGE_km   | Hi   | 8 $\alpha$ |
|          | Rapid | 0.50 | 0.50  | 0.00 | 0.50 | Switzerland | GR5J  | KGE_mod1 | Lo   | 8 $\alpha$ |
|          | Rapid | 0.50 | 1.00  | 0.50 | 0.33 | Switzerland | GR6J  | KGE_mod2 | Lo   | 1 $\alpha$ |
|          | Rapid | 0.50 | 0.50  | 0.00 | 0.50 | Switzerland | GR6J  | KGE_km   | Hi   | 2 $\alpha$ |
|          | Rapid | 0.50 | 1.50  | 0.67 | 0.25 | Switzerland | GR6J  | KGE      | HiLo | 2 $\alpha$ |
|          | Rapid | 0.50 | 0.50  | 0.00 | 0.50 | Switzerland | GR6J  | KGE_mod2 | Hi   | 4 $\alpha$ |
|          | Rapid | 0.50 | 1.00  | 0.50 | 0.33 | Switzerland | GR6J  | KGE_np   | Hi   | 4 $\alpha$ |
|          | Rapid | 0.50 | 0.50  | 0.00 | 0.50 | Switzerland | GR6J  | KGE_km   | Hi   | 4 $\alpha$ |
|          | Rapid | 1.00 | 1.50  | 0.33 | 0.67 | Switzerland | GR6J  | KGE_np   | Hi   | 8 $\alpha$ |
|          | Rapid | 0.50 | 1.00  | 0.50 | 0.33 | Switzerland | GR6J  | KGE      | HiLo | 8 $\alpha$ |
|          | Rapid | 0.50 | 1.50  | 0.67 | 0.25 | Switzerland | TUW   | KGE_mod1 | Hi   | 1 $\alpha$ |
|          | Rapid | 0.50 | 0.50  | 0.00 | 0.50 | Switzerland | TUW   | KGE_mod2 | Hi   | 1 $\alpha$ |
|          | Rapid | 0.50 | 1.00  | 0.50 | 0.33 | Switzerland | TUW   | KGE_np   | Hi   | 1 $\alpha$ |
|          | Rapid | 0.50 | 1.00  | 0.50 | 0.33 | Switzerland | TUW   | KGE_np   | Lo   | 1 $\alpha$ |
|          | Rapid | 1.00 | 1.50  | 0.33 | 0.67 | Switzerland | TUW   | KGE_np   | HiLo | 1 $\alpha$ |
|          | Rapid | 1.00 | 1.00  | 0.00 | 1.00 | Switzerland | TUW   | KGE_km   | HiLo | 1 $\alpha$ |
|          | Rapid | 0.50 | 1.00  | 0.50 | 0.33 | Switzerland | TUW   | KGE      | Hi   | 2 $\alpha$ |
|          | Rapid | 0.50 | 1.50  | 0.67 | 0.25 | Switzerland | TUW   | KGE_mod2 | Hi   | 2 $\alpha$ |
|          | Rapid | 1.00 | 1.00  | 0.00 | 1.00 | Switzerland | TUW   | KGE_np   | Hi   | 2 $\alpha$ |
|          | Rapid | 0.50 | 0.50  | 0.00 | 0.50 | Switzerland | TUW   | KGE_km   | Hi   | 2 $\alpha$ |
|          | Rapid | 0.50 | 0.50  | 0.00 | 0.50 | Switzerland | TUW   | KGE      | Lo   | 2 $\alpha$ |
|          | Rapid | 0.50 | 0.50  | 0.00 | 0.50 | Switzerland | TUW   | KGE_mod1 | Lo   | 2 $\alpha$ |
|          | Rapid | 0.50 | 0.50  | 0.00 | 0.50 | Switzerland | TUW   | KGE_mod2 | Lo   | 2 $\alpha$ |
|          | Rapid | 0.50 | 0.50  | 0.00 | 0.50 | Switzerland | TUW   | KGE_np   | Lo   | 2 $\alpha$ |

| id_gauge | Type  | POD  | fbias | FAR  | CSI  | Country     | Model | OF_name  | Case | w         |
|----------|-------|------|-------|------|------|-------------|-------|----------|------|-----------|
|          | Rapid | 0.50 | 1.00  | 0.50 | 0.33 | Switzerland | TUW   | KGE_km   | Lo   | $2\alpha$ |
|          | Rapid | 0.50 | 1.00  | 0.50 | 0.33 | Switzerland | TUW   | KGE_km   | HiLo | $2\alpha$ |
|          | Rapid | 0.50 | 1.00  | 0.50 | 0.33 | Switzerland | TUW   | KGE      | Hi   | $4\alpha$ |
|          | Rapid | 0.50 | 0.50  | 0.00 | 0.50 | Switzerland | TUW   | KGE_mod1 | Hi   | $4\alpha$ |
|          | Rapid | 0.50 | 1.00  | 0.50 | 0.33 | Switzerland | TUW   | KGE_mod2 | Hi   | $4\alpha$ |
|          | Rapid | 0.50 | 0.50  | 0.00 | 0.50 | Switzerland | TUW   | KGE_np   | Hi   | $4\alpha$ |
|          | Rapid | 0.50 | 1.50  | 0.67 | 0.25 | Switzerland | TUW   | KGE_km   | Hi   | $4\alpha$ |
|          | Rapid | 0.50 | 1.00  | 0.50 | 0.33 | Switzerland | TUW   | KGE_mod1 | Lo   | $4\alpha$ |
|          | Rapid | 0.50 | 0.50  | 0.00 | 0.50 | Switzerland | TUW   | KGE_np   | Lo   | $4\alpha$ |
|          | Rapid | 0.50 | 0.50  | 0.00 | 0.50 | Switzerland | TUW   | KGE      | HiLo | $4\alpha$ |
|          | Rapid | 0.50 | 1.00  | 0.50 | 0.33 | Switzerland | TUW   | KGE_mod2 | HiLo | $4\alpha$ |
|          | Rapid | 0.50 | 1.00  | 0.50 | 0.33 | Switzerland | TUW   | KGE      | Lo   | $8\alpha$ |
|          | Rapid | 0.50 | 0.50  | 0.00 | 0.50 | Switzerland | TUW   | KGE_mod1 | HiLo | $8\alpha$ |
|          | Rapid | 0.50 | 0.50  | 0.00 | 0.50 | Switzerland | TUW   | KGE_mod2 | HiLo | $8\alpha$ |
|          | Rapid | 0.50 | 0.50  | 0.00 | 0.50 | Switzerland | TUW   | KGE_km   | HiLo | $8\alpha$ |
